# Supplementary material for: Patients with Spinal Muscular Atrophy Type 1 Achieve and Maintain Bulbar Function Following Onasemnogene Abeparvovec Treatment
Source: PubMed Central journal article supplement — J Neuromuscul Dis. 2023 Jul 4;10(4):531–40. doi: 10.3233/JND-221531 (PMC10357176; doi:10.3233/jnd-221531), 2023-07-04
Supplement: jnd-10-jnd221531-s001.pdf [file jnd-10-jnd221531-s001.pdf]

**Supplementary Table. Common adverse events in primary studies<sup>a</sup>**

|                                          | <b>START [20]</b> | <b>STRIVE-US [21]</b> | <b>STRIVE-EU [22]</b> |
|------------------------------------------|-------------------|-----------------------|-----------------------|
|                                          | <b>(N=12),</b>    | <b>(N=22),</b>        | <b>(N=33),</b>        |
|                                          | <b>n (%)</b>      | <b>n (%)</b>          | <b>n (%)</b>          |
| All adverse events                       | 12 (100)          | 22 (100)              | 32 (97)               |
| Pyrexia                                  | 6 (50)            | 12 (55)               | 22 (67)               |
| Upper respiratory tract infection        | 10 (83)           | 11 (50)               | 11 (33)               |
| Vomiting                                 | 8 (67)            | 4 (18)                | 8 (24)                |
| Constipation                             | 7 (58)            | 9 (41)                | 7 (21)                |
| Nasal congestion                         | 6 (50)            | 3 (14)                | 4 (12)                |
| Increased ALT                            | —                 | 5 (23)                | 9 (27)                |
| Increase AST                             | 1 (8)             | 6 (27)                | 8 (24)                |
| Increased aminotransferase concentration | 3 (25)            | —                     | —                     |
| Drug-related adverse events              | 3 (25)            | 12 (55)               | 24 (73)               |

|                                         |         |         |         |
|-----------------------------------------|---------|---------|---------|
| Pyrexia                                 | —       | —       | 4 (12)  |
| Constipation                            | —       | —       | 1 (3)   |
| Increased ALT                           | —       | 5 (23)  | 7 (21)  |
| Increase AST                            | 1 (8)   | 6 (27)  | 6 (18)  |
| Serious adverse events                  | 10 (83) | 10 (45) | 19 (58) |
| Pyrexia                                 | —       | —       | 4 (12)  |
| Upper respiratory tract infection       | 3 (25)  | 1 (5)   | 3 (9)   |
| Nasopharyngitis                         | —       | —       | 1 (3)   |
| Increased ALT                           | —       | 1 (5)   | 1 (3)   |
| Increase AST                            | —       | 1 (5)   | 1 (3)   |
| Serious and drug-related adverse events | 3 (25)  | 3 (14)  | 6 (18)  |
| Pyrexia                                 | —       | —       | 2 (6)   |
| Increased ALT                           | —       | 1 (5)   | 1 (3)   |
| Increased AST                           | —       | 1 (5)   | 1 (3)   |

ALT, alanine aminotransferase; AST, aspartate aminotransferase.

<sup>a</sup>Based on the safety population set in each study.
